# Supplementary material for: Comparatively studying the local atomic structures of metallic glasses upon cyclic-loading by computer simulations
Source: Royal Society of Chemistry journal article supplement (doi:10.1039/c7ra00570a), 2017-01-01

## Supplementary material

**Fig. S1** The correlation between energy and temperature of  $\text{Ni}_{35}\text{Zr}_{65}$ ,  $\text{Ni}_{50}\text{Zr}_{50}$  and  $\text{Ni}_{65}\text{Zr}_{35}$  alloy upon rapidly quenching with the cooling rate of  $10^{13}$  K/s. One notes that the glass transition temperature  $T_g$  of  $\text{Ni}_{35}\text{Zr}_{65}$ ,  $\text{Ni}_{50}\text{Zr}_{50}$  and  $\text{Ni}_{65}\text{Zr}_{35}$  alloy are about 1000 K, 1100 K and 1200 K, respectively. In addition, all the alloy melts were first equilibrated at 2000 K for 200 ps, to reach relatively stable states at which the related dynamic variables show no secular variation, and then rapidly quenched down to the room temperature, obtaining the metallic glasses.

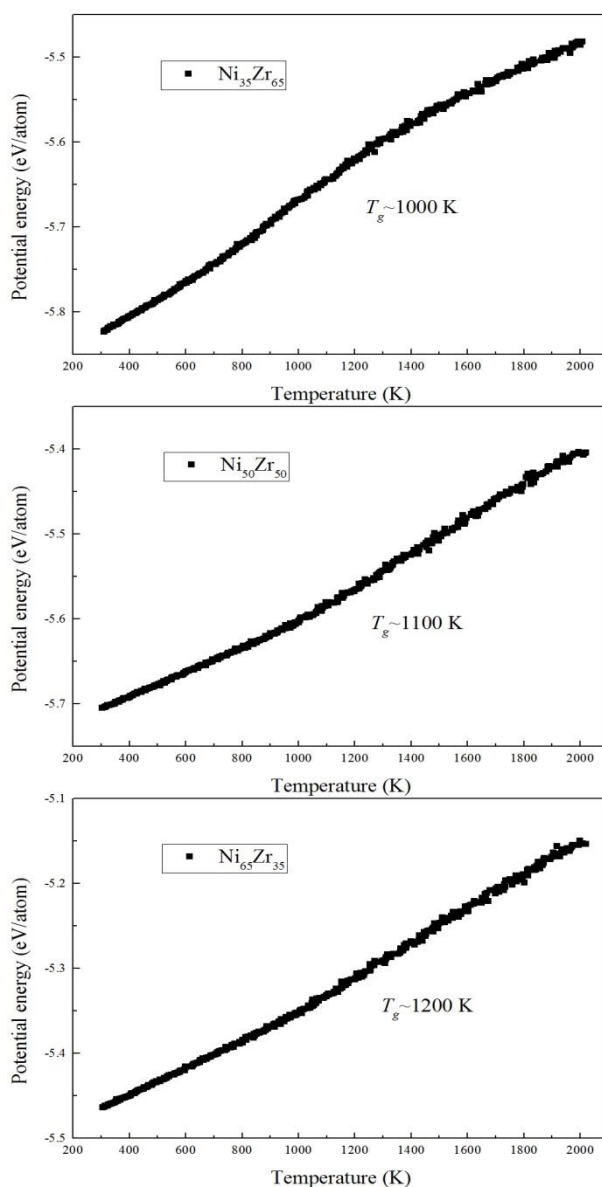

Supplement: c7ra00570a1.pdf [file c7ra00570a1.pdf]
